# Supplementary material for: Doubtful Clinical Value of Subtyping Anti-U1-RNP Antibodies Regarding the RNP-70 kDa Antigen in Sera of Patients with Systemic Lupus Erythematosus
Source: MDPI journal article supplement (doi:10.3390/ijms241210398), 2023-06-20

**Supplementary Figure S1:** A box and whiskers plot (range, 25<sup>th</sup> to 75<sup>th</sup> percentile and median depicted) illustrating anti-U1-RNP and anti-RNP70 antibody levels in patients with SLE and MCTD testing positive for the antibodies. We observed a non-significant trend of higher anti-RNP70 antibody levels among subjects with MCTD compared to SLE.

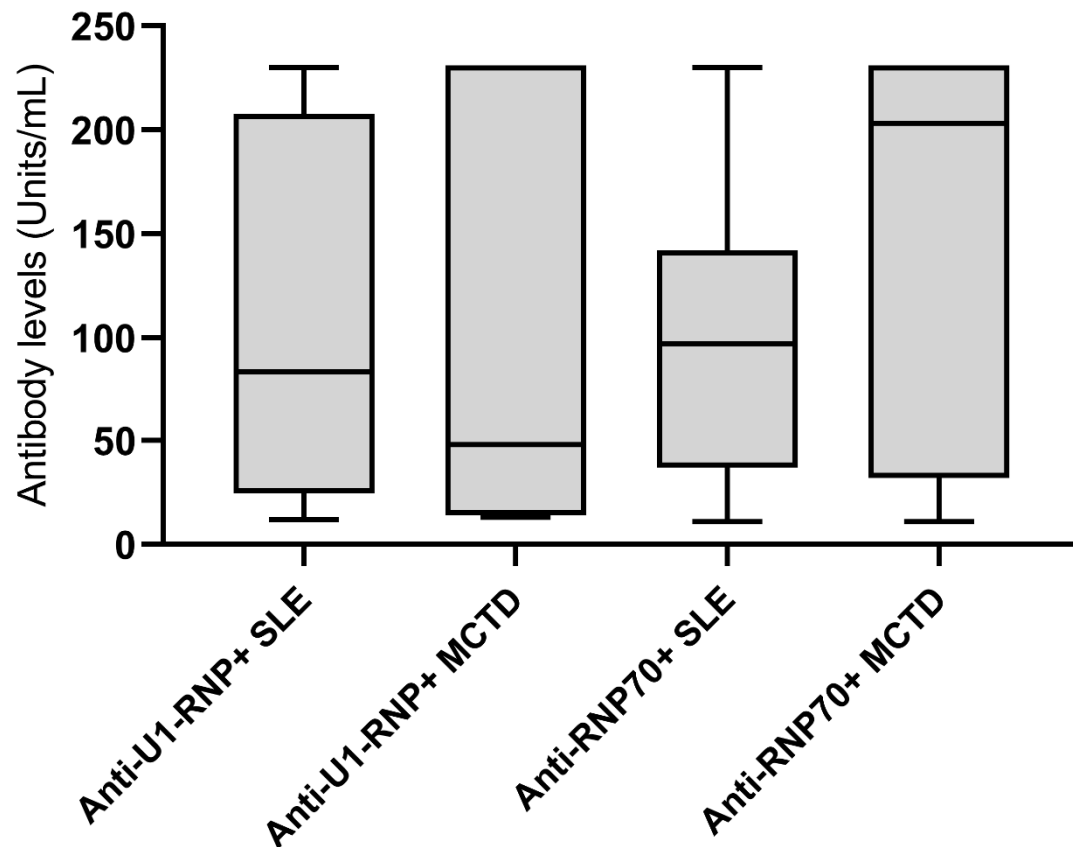

Supplement: s1 [file s1]
